# Supplementary material for: Partitioning anthropogenic and natural methane emissions in Finland during 2000–2021 by combining bottom-up and top-down estimates
Source: Copernicus journal article supplement (doi:10.5194/acp-25-2181-2025), 2025-02-19
Supplement: Supplementary file 1 [file acp-25-2181-2025-supplement.pdf]

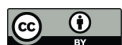

*Supplement of*

## **Partitioning anthropogenic and natural methane emissions in Finland during 2000–2021 by combining bottom-up and top-down estimates**

**Maria K. Tenkanen et al.**

*Correspondence to:* Maria K. Tenkanen (maria.tenkanen@fmi.fi)

The copyright of individual parts of the supplement might differ from the article licence.

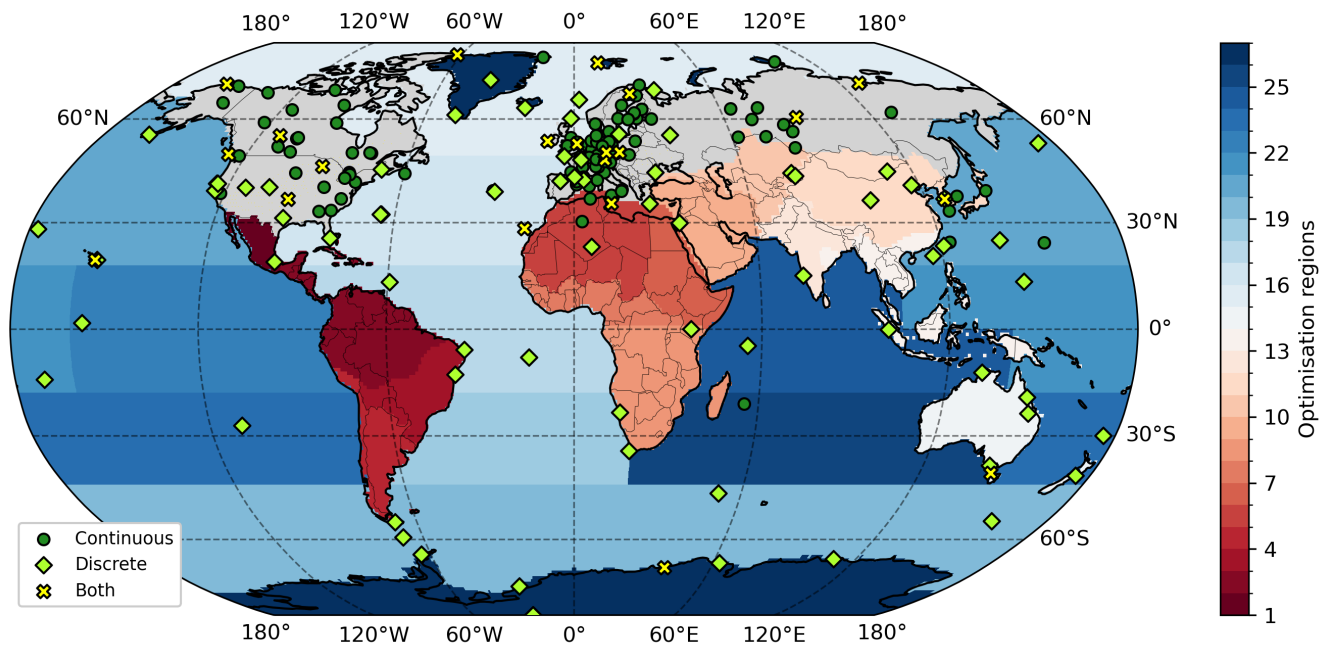

**Figure S1.** The locations of the atmospheric CH<sub>4</sub> measurement sites and the type of measurement used (continuous, discrete or both) in the inversions. The areas optimised regionally are shown with blues and reds, and the grey colour shows the area optimised at 1° latitude × 1° longitude resolution.

**Table S1.** List of surface observation sites used in inversions. Observation Uncertainty (Obs. Unc.) is used to define diagonal values in the observation covariance matrix. The data type is categorised into two measurements (discrete (D) and continuous (C)).

| Sitecode | Site Name                                          | Country              | Contributor       | Longitude<br>[°E] | Latitude<br>[°N] | Height*<br>[m a.s.l.] | Obs. Unc.<br>[ppb] | Data type<br>D/C | Date min.**<br>[year/month] | Date max.<br>[year/month] |
|----------|----------------------------------------------------|----------------------|-------------------|-------------------|------------------|-----------------------|--------------------|------------------|-----------------------------|---------------------------|
| ABP      | Arembepe, Bahia                                    | Brazil               | NOAA ESRL         | -38.17            | -12.76           | 6.00                  | 4.5                | D                | 2006/10                     | 2010/01                   |
| ABT      | Abbotsford, British Columbia                       | Canada               | ECCC              | -122.34           | 49.01            | 93.00                 | 30.0               | C                | 2014/03                     | 2020/12                   |
| ALT      | Alert, Nunavut                                     | Canada               | NOAA ESRL         | -62.51            | 82.45            | 190.00                | 15.0               | D                | 2000/01                     | 2021/10                   |
| ALT      | Alert, Nunavut                                     | Canada               | ECCC              | -62.51            | 82.45            | 195.00                | 15.0               | C                | 2000/01                     | 2020/12                   |
| AMT      | Argyle, Maine                                      | United States        | NOAA ESRL         | -68.66            | 45.01            | 157.00                | 30.0               | D                | 2003/09                     | 2006/11                   |
| AMY      | Anmyeon-do                                         | Republic of Korea    | NOAA ESRL         | 126.33            | 36.54            | 87.00                 | 30.0               | D                | 2013/12                     | 2021/11                   |
| ARA      | Arcturus                                           | Australia            | CSIRO             | 148.47            | -23.86           | 185.00                | 15.0               | D                | 2010/05                     | 2013/10                   |
| ASC      | Ascension Island                                   | United Kingdom       | NOAA ESRL         | -14.40            | -7.97            | 90.00                 | 15.0               | D                | 2000/01                     | 2021/11                   |
| ASK      | Assekrem                                           | Algeria              | NOAA ESRL         | 5.63              | 23.26            | 2715.00               | 25.0               | D                | 2000/01                     | 2019/11                   |
| AZR      | Terceira Island, Azores                            | Portugal             | NOAA ESRL         | -27.36            | 38.76            | 24.00                 | 15.0               | D                | 2000/01                     | 2021/09                   |
| AZV      | Azovo                                              | Russian Federation   | NIES              | 73.03             | 54.71            | 190.00                | 30.0               | C                | 2009/10                     | 2018/12                   |
| BAL      | Baltic Sea                                         | Poland               | NOAA ESRL         | 16.67             | 55.35            | 28.00                 | 75.0               | D                | 2000/01                     | 2005/01                   |
| BAR      | Baranova                                           | Russian Federation   | FMI               | 101.62            | 79.28            | 30.00                 | 4.5                | C                | 2015/11                     | 2021/02                   |
| BCK      | Behchoko, Northwest Territories                    | Canada               | ECCC              | -115.92           | 62.80            | 220.00                | 15.0               | C                | 2010/10                     | 2020/12                   |
| BHD      | Baring Head Station                                | New Zealand          | NOAA ESRL         | 174.87            | -41.41           | 90.00                 | 4.5                | D                | 2002/03                     | 2021/10                   |
| BIK      | Bialystok                                          | Poland               | MPIBGC            | 23.01             | 53.23            | 483.00                | 25.0               | C                | 2005/07                     | 2014/06                   |
| BIR      | Birkenes                                           | Norway               | NILU              | 8.25              | 58.39            | 225.00                | 25.0               | C                | 2014/01                     | 2014/01                   |
| BKT      | Bukit Kototabang                                   | Indonesia            | NOAA ESRL         | 100.31            | -0.20            | 875.00                | 75.0               | D                | 2004/01                     | 2021/11                   |
| BLK      | Baker Lake, Nunavut                                | Canada               | ECCC              | -96.01            | 64.33            | 61.00                 | 15.0               | C                | 2017/07                     | 2019/11                   |
| BME      | St. Davids Head, Bermuda                           | United Kingdom       | NOAA ESRL         | -64.65            | 32.37            | 17.00                 | 15.0               | D                | 2000/01                     | 2010/01                   |
| BMW      | Tudor Hill, Bermuda                                | United Kingdom       | NOAA ESRL         | -64.88            | 32.26            | 33.00                 | 15.0               | D                | 2000/01                     | 2021/12                   |
| BRA      | Bratt's Lake Saskatchewan                          | Canada               | ECCC              | -104.71           | 50.20            | 630.00                | 75.0               | C                | 2009/10                     | 2020/12                   |
| BRW      | Barrow Atmospheric Baseline Observatory            | United States        | NOAA ESRL         | -156.61           | 71.32            | 27.46                 | 15.0               | C                | 2000/01                     | 2021/12                   |
| BRW      | Barrow Atmospheric Baseline Observatory            | United States        | NOAA ESRL         | -156.58           | 71.32            | 16.00                 | 15.0               | D                | 2000/01                     | 2021/11                   |
| BRZ      | Berezorechka                                       | Russian Federation   | NIES              | 84.33             | 56.15            | 248.00                | 75.0               | C                | 2008/05                     | 2018/12                   |
| BSC      | Black Sea, Constanta                               | Romania              | NOAA ESRL         | 28.66             | 44.18            | 5.00                  | 75.0               | D                | 2000/01                     | 2005/01                   |
| BSD      | Bilsdale                                           | United Kingdom       | UNIVBRIS          | -1.15             | 54.36            | 628.00                | 30.0               | C                | 2014/01                     | 2019/12                   |
| CBA      | Cold Bay, Alaska                                   | United States        | NOAA ESRL         | -162.71           | 55.21            | 25.00                 | 15.0               | D                | 2000/01                     | 2021/11                   |
| CBY      | Cambridge Bay, Nunavut Territory                   | Canada               | ECCC              | -105.06           | 69.13            | 47.00                 | 15.0               | C                | 2012/12                     | 2020/12                   |
| CDL      | Candle Lake, Saskatchewan                          | Canada               | ECCC              | -105.12           | 53.99            | 630.00                | 30.0               | C                | 2002/06                     | 2007/12                   |
| CFA      | Cape Ferguson                                      | Australia            | CSIRO             | 147.06            | -19.28           | 5.00                  | 25.0               | D                | 2000/01                     | 2021/04                   |
| CGO      | Cape Grim, Tasmania                                | Australia            | NOAA ESRL         | 144.68            | -40.68           | 164.00                | 4.5                | D                | 2000/01                     | 2021/10                   |
| CGO      | Cape Grim                                          | Australia            | CSIRO             | 144.68            | -40.68           | 94.00                 | 15.0               | C                | 2012/07                     | 2021/07                   |
| CGR      | Charles Point, Darwin                              | Australia            | CSIRO             | 12.65             | 37.67            | 9.00                  | 25.0               | C                | 2015/04                     | 2018/12                   |
| CHL      | Churchill, Manitoba                                | Canada               | ECCC              | -93.82            | 58.74            | 89.00                 | 15.0               | C                | 2011/10                     | 2020/12                   |
| CHM      | Chibougamau, Quebec                                | Canada               | ECCC              | -74.34            | 49.69            | 423.00                | 30.0               | C                | 2007/08                     | 2011/04                   |
| CHR      | Christmas Island                                   | Republic of Kiribati | NOAA ESRL         | -157.15           | 1.70             | 5.00                  | 15.0               | D                | 2000/01                     | 2020/01                   |
| CIB      | Centro de Investigacion de la Baja Atmosfera (...) | Spain                | NOAA ESRL         | -4.93             | 41.81            | 850.00                | 25.0               | D                | 2009/05                     | 2009/05                   |
| CMN      | Mt. Cimone Station                                 | Italy                | ICOS-ATC,CNR-ISAC | 10.70             | 44.19            | 2173.00               | 15.0               | C                | 2008/07                     | 2021/12                   |
| CPS      | Chapais, Quebec                                    | Canada               | ECCC              | -74.98            | 49.82            | 431.00                | 15.0               | C                | 2011/12                     | 2020/12                   |
| CPT      | Cape Point                                         | South Africa         | NOAA ESRL         | 18.49             | -34.35           | 260.00                | 25.0               | D                | 2010/02                     | 2021/10                   |
| CRI      | Cape Rama                                          | India                | CSIRO             | 73.83             | 15.08            | 66.00                 | 75.0               | D                | 2000/01                     | 2013/01                   |
| CRV      | Carbon in Arctic Reservoirs Vulnerability Expe...  | United States        | NOAA ESRL         | -147.60           | 64.99            | 643.13                | 15.0               | C                | 2011/10                     | 2021/12                   |
| CRZ      | Crozet Island                                      | France               | NOAA ESRL         | 51.85             | -46.43           | 202.00                | 4.5                | D                | 2000/01                     | 2021/01                   |
| CUR      | Monte Curcio                                       | Italy                | IIA               | 16.42             | 39.32            | 1801.00               | 15.0               | C                | 2014/12                     | 2017/12                   |
| CYA      | Casey Station, Antarctica                          | Australia            | CSIRO             | 110.52            | -66.28           | 55.00                 | 4.5                | D                | 2000/01                     | 2021/01                   |

\*Sampling heights from which atmospheric CH<sub>4</sub> is sampled in TM5. \*\*Observations used in this study between 2000 and 2021.

**Table S1.** Continuation to Table S1.

| Sitecode | Site Name                                | Country            | Contributor       | Longitude<br>[°E] | Latitude<br>[°N] | Height*<br>[m a.s.l.] | Obs. Unc.<br>[ppb] | Data type<br>D/C | Date min.**<br>[year/month] | Date max.<br>[year/month] |
|----------|------------------------------------------|--------------------|-------------------|-------------------|------------------|-----------------------|--------------------|------------------|-----------------------------|---------------------------|
| DEM      | Demyanskoe                               | Russian Federation | NIES              | 70.87             | 59.79            | 155.00                | 30.0               | C                | 2005/09                     | 2018/12                   |
| DRP      | Drake Passage                            | Drake Passage      | NOAA ESRL         | -61.68            | -59.07           | 10.00                 | 4.5                | D                | 2006/03                     | 2021/05                   |
| DSI      | Dongsha Island                           | Taiwan             | NOAA ESRL         | 116.73            | 20.70            | 8.00                  | 15.0               | D                | 2010/03                     | 2021/10                   |
| DVV      | Danville, Virginia                       | United States      | PSU               | -79.44            | 36.71            | 492.00                | 15.0               | C                | 2016/07                     | 2017/12                   |
| EGB      | Egbert, Ontario                          | Canada             | ECCC              | -79.78            | 44.23            | 276.00                | 25.0               | C                | 2005/03                     | 2020/12                   |
| EIC      | Easter Island                            | Chile              | NOAA ESRL         | -109.45           | -27.13           | 72.00                 | 4.5                | D                | 2000/01                     | 2019/11                   |
| ENA      | Eastern North Atlantic, Graciosa, Azores | Portugal           | LBNL-ARM          | -28.03            | 39.09            | 40.48                 | 25.0               | C                | 2015/07                     | 2019/12                   |
| ESP      | Estevan Point, British Columbia          | Canada             | CSIRO             | -126.53           | 49.38            | 47.00                 | 25.0               | D                | 2000/03                     | 2002/01                   |
| ESP      | Estevan Point, British Columbia          | Canada             | ECCC              | -126.54           | 49.38            | 47.00                 | 25.0               | C                | 2009/03                     | 2020/12                   |
| EST      | Esther, Alberta                          | Canada             | ECCC              | -110.21           | 51.67            | 757.00                | 30.0               | C                | 2010/01                     | 2020/11                   |
| ETL      | East Trout Lake, Saskatchewan            | Canada             | ECCC              | -104.99           | 54.35            | 598.00                | 30.0               | C                | 2005/08                     | 2020/10                   |
| FNE      | Fort Nelson, British Columbia            | Canada             | ECCC              | -122.57           | 58.84            | 376.00                | 30.0               | C                | 2014/07                     | 2020/12                   |
| FSD      | Fraserdale                               | Canada             | ECCC              | -81.57            | 49.88            | 250.00                | 30.0               | C                | 2000/01                     | 2020/05                   |
| GAT      | Gartow                                   | Germany            | ICOS-ATC.HPB      | 11.44             | 53.07            | 411.00                | 25.0               | C                | 2016/05                     | 2021/12                   |
| GCI      | Millerville, AL                          | United States      | PSU               | -85.89            | 33.18            | 428.00                | 25.0               | C                | 2017/10                     | 2018/05                   |
| GMI      | Mariana Islands                          | Guam               | NOAA ESRL         | 144.66            | 13.39            | 8.00                  | 15.0               | D                | 2000/01                     | 2021/09                   |
| GPA      | Gunn Point                               | Australia          | CSIRO             | 131.04            | -12.25           | 37.00                 | 75.0               | D                | 2010/08                     | 2021/02                   |
| HBA      | Halley Station, Antarctica               | United Kingdom     | NOAA ESRL         | -26.21            | -75.61           | 35.00                 | 4.5                | D                | 2000/01                     | 2021/02                   |
| HEI      | Heidelberg                               | Germany            | IUP               | 8.68              | 49.42            | 143.00                | 30.0               | C                | 2005/01                     | 2014/09                   |
| HNP      | Hanlan's Point, Ontario                  | Canada             | ECCC              | -79.39            | 43.61            | 97.00                 | 25.0               | C                | 2014/06                     | 2020/12                   |
| HPB      | Hohenpeissenberg                         | Germany            | NOAA ESRL         | 11.02             | 47.80            | 941.00                | 25.0               | D                | 2006/04                     | 2006/04                   |
| HPB      | Hohenpeissenberg                         | Germany            | ICOS-ATC.HPB      | 11.02             | 47.80            | 1065.00               | 25.0               | C                | 2015/09                     | 2021/12                   |
| HSU      | Humboldt State University                | United States      | NOAA ESRL         | -124.44           | 41.57            | 7.60                  | 30.0               | D                | 2008/05                     | 2017/05                   |
| HTM      | Hyltemossa                               | Sweden             | ICOS-ATC.LUND-CEC | 13.42             | 56.10            | 265.00                | 25.0               | C                | 2017/04                     | 2021/12                   |
| HUN      | Hegyhatsal                               | Hungary            | NOAA ESRL         | 16.65             | 46.95            | 344.00                | 25.0               | D                | 2000/01                     | 2004/12                   |
| ICE      | Storhofdi, Vestmannaeyjar                | Iceland            | NOAA ESRL         | -20.29            | 63.40            | 121.70                | 15.0               | D                | 2000/01                     | 2021/11                   |
| IGR      | Igrim                                    | Russian Federation | NIES              | 64.41             | 63.19            | 89.00                 | 30.0               | C                | 2005/04                     | 2013/07                   |
| INU      | Inuvik,Northwest Territories             | Canada             | ECCC              | -133.53           | 68.32            | 123.00                | 15.0               | C                | 2012/02                     | 2020/12                   |
| IPR      | Ispira                                   | Italy              | ICOS-ATC.JRC      | 8.64              | 45.81            | 310.00                | 30.0               | C                | 2007/10                     | 2021/12                   |
| IZO      | Izana, Tenerife, Canary Islands          | Spain              | NOAA ESRL         | -16.48            | 28.30            | 2377.90               | 25.0               | D                | 2000/01                     | 2021/10                   |
| JFJ      | Jungfrauoch                              | Switzerland        | ICOS-ATC.HFSJG    | 7.99              | 46.55            | 3585.00               | 15.0               | C                | 2005/02                     | 2021/12                   |
| KEY      | Key Biscayne, Florida                    | United States      | NOAA ESRL         | -80.20            | 25.67            | 6.00                  | 25.0               | D                | 2000/02                     | 2021/12                   |
| KIT      | Karlsruhe                                | Germany            | ICOS-ATC.HPB      | 8.42              | 49.09            | 310.00                | 30.0               | C                | 2016/12                     | 2021/12                   |
| KJN      | Kjolnes                                  | Norway             | Univ. Exeter      | 29.23             | 70.85            | 20.00                 | 15.0               | C                | 2013/10                     | 2018/08                   |
| KMP      | Kumpula                                  | Finland            | FMI               | 24.96             | 60.20            | 53.00                 | 30.0               | C                | 2010/01                     | 2021/12                   |
| KRE      | Kresin u Pacova                          | Czech Republic     | ICOS              | 15.08             | 49.57            | 784.00                | 25.0               | C                | 2017/04                     | 2021/12                   |
| KRS      | Karasevoe                                | Russian Federation | NIES              | 82.42             | 58.25            | 156.00                | 30.0               | C                | 2004/09                     | 2018/12                   |
| KUM      | Cape Kumukahi, Hawaii                    | United States      | NOAA ESRL         | -155.01           | 19.51            | 3.00                  | 15.0               | D                | 2000/01                     | 2021/12                   |
| KZD      | Sary Taukum                              | Kazakhstan         | NOAA ESRL         | 75.57             | 44.45            | 600.00                | 75.0               | D                | 2000/01                     | 2009/08                   |
| KZM      | Plateau Assy                             | Kazakhstan         | NOAA ESRL         | 77.87             | 43.25            | 2524.00               | 25.0               | D                | 2000/01                     | 2009/08                   |
| LEF      | Park Falls, Wisconsin                    | United States      | NOAA ESRL         | -90.27            | 45.95            | 868.00                | 30.0               | C                | 2010/09                     | 2021/12                   |
| LEF      | Park Falls, Wisconsin                    | United States      | NOAA ESRL         | -90.26            | 45.95            | 868.00                | 30.0               | D                | 2000/01                     | 2021/12                   |
| LIN      | Lindenberg                               | Germany            | ICOS-ATC.HPB      | 14.12             | 52.17            | 171.00                | 30.0               | C                | 2015/10                     | 2021/12                   |
| LLB      | Lac La Biche, Alberta                    | Canada             | NOAA ESRL         | -112.45           | 54.95            | 546.10                | 30.0               | D                | 2008/01                     | 2013/02                   |
| LLB      | Lac La Biche, Alberta                    | Canada             | ECCC              | -112.47           | 54.95            | 590.00                | 30.0               | C                | 2007/04                     | 2020/12                   |
| LLN      | Lulin                                    | Taiwan             | NOAA ESRL         | 120.86            | 23.47            | 2867.00               | 25.0               | D                | 2006/08                     | 2021/11                   |
| LMP      | Lampedusa                                | Italy              | NOAA ESRL         | 12.63             | 35.52            | 50.00                 | 25.0               | D                | 2006/10                     | 2006/10                   |
| LMP      | Lampedusa                                | Italy              | ICOS-ATC.ENEAA    | 12.63             | 35.52            | 53.00                 | 25.0               | C                | 2020/01                     | 2021/12                   |
| LMT      | Lamezia Terme                            | Italy              | ISAC              | 16.23             | 38.88            | 14.00                 | 30.0               | C                | 2015/01                     | 2016/12                   |
| LPO      | Ile Grande                               | France             | LSCE              | -3.58             | 48.80            | 20.00                 | 15.0               | D                | 2005/01                     | 2013/08                   |
| LUT      | Lutjewad                                 | Netherlands        | ICOS-ATC.RUG      | 6.35              | 53.40            | 61.00                 | 25.0               | C                | 2006/05                     | 2021/12                   |

**Table S1.** Continuation to Table S1.

| Sitecode | Site Name                                       | Country            | Contributor       | Longitude<br>[°E] | Latitude<br>[°N] | Height*<br>[m a.s.l.] | Obs. Unc.<br>[ppb] | Data type<br>D/C | Date min.**<br>[year/month] | Date max.<br>[year/month] |
|----------|-------------------------------------------------|--------------------|-------------------|-------------------|------------------|-----------------------|--------------------|------------------|-----------------------------|---------------------------|
| MAA      | Mawson, Antarctica                              | Australia          | CSIRO             | 62.87             | -67.62           | 32.00                 | 4.5                | D                | 2000/02                     | 2021/02                   |
| MEX      | High Altitude Global Climate Observation Center | Mexico             | NOAA ESRL         | -97.31            | 18.98            | 4469.00               | 15.0               | D                | 2009/01                     | 2021/09                   |
| MHD      | Mace Head, County Galway                        | Ireland            | NOAA ESRL         | -9.90             | 53.32            | 26.00                 | 25.0               | D                | 2000/01                     | 2005/01                   |
| MID      | Sand Island, Midway                             | United States      | NOAA ESRL         | -177.38           | 28.21            | 8.00                  | 15.0               | D                | 2000/01                     | 2021/11                   |
| MKN      | Mt. Kenya                                       | Kenya              | NOAA ESRL         | 37.30             | -0.06            | 3649.00               | 25.0               | D                | 2003/12                     | 2011/06                   |
| MLO      | Mauna Loa, Hawaii                               | United States      | NOAA ESRL         | -155.58           | 19.54            | 3437.00               | 15.0               | C                | 2000/01                     | 2021/12                   |
| MLO      | Mauna Loa, Hawaii                               | United States      | NOAA ESRL         | -155.58           | 19.54            | 3402.00               | 15.0               | D                | 2000/01                     | 2021/12                   |
| MNM      | Minamitorishima                                 | Japan              | JMA               | 153.98            | 24.29            | 27.10                 | 15.0               | C                | 2000/01                     | 2020/12                   |
| MQA      | Macquarie Island                                | Australia          | CSIRO             | 158.97            | -54.48           | 13.00                 | 4.5                | D                | 2000/01                     | 2021/02                   |
| MRC      | Marcellus Pennsylvania                          | United States      | PSU               | -76.42            | 41.47            | 652.00                | 75.0               | C                | 2015/05                     | 2018/12                   |
| NAT      | Farol De Mae Luiza Lighthouse                   | Brazil             | NOAA ESRL         | -35.19            | -5.51            | 20.00                 | 15.0               | D                | 2010/09                     | 2020/03                   |
| NGL      | Neuglobsow                                      | Germany            | UBA               | 13.03             | 53.14            | 62.00                 | 75.0               | C                | 2005/01                     | 2013/12                   |
| NMB      | Gobabeb                                         | Namibia            | NOAA ESRL         | 15.01             | -23.58           | 461.00                | 25.0               | D                | 2000/01                     | 2021/09                   |
| NOR      | Norunda                                         | Sweden             | ICOS-ATC.LUND-CEC | 17.48             | 60.09            | 146.00                | 15.0               | C                | 2017/04                     | 2021/12                   |
| NOY      | Noyabrsk                                        | Russian Federation | NIES              | 75.78             | 63.43            | 188.00                | 30.0               | C                | 2005/10                     | 2018/12                   |
| NWR      | Niwot Ridge, Colorado                           | United States      | NOAA ESRL         | -105.57           | 40.05            | 3526.00               | 15.0               | D                | 2000/01                     | 2021/11                   |
| OPE      | Observatoire perenne de l'environnement         | France             | ICOS-ATC.LSCE     | 5.50              | 48.56            | 510.00                | 30.0               | C                | 2011/07                     | 2021/12                   |
| OTA      | Otway Basin                                     | Australia          | CSIRO             | 142.82            | -38.52           | 50.00                 | 30.0               | D                | 2005/09                     | 2014/08                   |
| OXX      | Ochsenkopf                                      | Germany            | NOAA ESRL         | 11.81             | 50.03            | 1185.00               | 30.0               | D                | 2003/03                     | 2006/07                   |
| OXX      | Ochsenkopf                                      | Germany            | ICOS-ATC.HPB      | 11.81             | 50.03            | 1185.00               | 30.0               | C                | 2006/06                     | 2021/12                   |
| PAL      | Pallas-Sammaltunturi, GAW Station               | Finland            | NOAA ESRL         | 24.12             | 67.97            | 570.00                | 15.0               | D                | 2001/12                     | 2005/01                   |
| PAL      | Pallas-Sammaltunturi, GAW Station               | Finland            | FMI               | 24.12             | 67.97            | 570.00                | 15.0               | C                | 2004/02                     | 2005/01                   |
| PAL      | Pallas-Sammaltunturi, GAW Station               | Finland            | ICOS-ATC.FMI      | 24.12             | 67.97            | 577.00                | 15.0               | C                | 2005/01                     | 2021/12                   |
| PDM      | Pic du Midi                                     | France             | LSCE              | 0.14              | 42.94            | 2887.00               | 15.0               | D                | 2005/02                     | 2018/02                   |
| POC      | Pacific Ocean                                   | Pacific Ocean      | NOAA ESRL         | -130.75           | 0.12             | 20.00                 | 15.0               | D                | 2000/01                     | 2017/07                   |
| PSA      | Palmer Station, Antarctica                      | United States      | NOAA ESRL         | -64.05            | -64.77           | 15.00                 | 4.5                | D                | 2000/01                     | 2021/05                   |
| PTA      | Point Arena, California                         | United States      | NOAA ESRL         | -123.74           | 38.95            | 22.00                 | 25.0               | D                | 2000/01                     | 2011/05                   |
| PUI      | Puijo                                           | Finland            | ICOS-ATC.UEF      | 27.66             | 62.91            | 84.00                 | 30.0               | C                | 2011/11                     | 2020/12                   |
| PUY      | Puy de Dome                                     | France             | ICOS-ATC.LSCE     | 2.97              | 45.77            | 1475.00               | 15.0               | C                | 2010/07                     | 2021/12                   |
| RPB      | Ragged Point                                    | Barbados           | NOAA ESRL         | -59.43            | 13.16            | 20.00                 | 15.0               | D                | 2000/01                     | 2021/11                   |
| RUN      | La Réunion                                      | France             | ICOS-ATC.LSCE     | 55.38             | -21.08           | 2160.00               | 15.0               | C                | 2018/05                     | 2021/12                   |
| RYO      | Ryori                                           | Japan              | JMA               | 141.82            | 39.03            | 280.00                | 15.0               | C                | 2000/01                     | 2020/12                   |
| SAC      | Saclay                                          | France             | ICOS-ATC.CEA      | 2.14              | 48.72            | 260.00                | 75.0               | C                | 2017/05                     | 2021/12                   |
| SCT      | Beech Island, South Carolina                    | United States      | NOAA ESRL         | -81.83            | 33.41            | 420.20                | 75.0               | C                | 2015/08                     | 2021/12                   |
| SDZ      | Shangdianzi                                     | China              | NOAA ESRL         | 117.12            | 40.65            | 298.00                | 15.0               | D                | 2009/09                     | 2015/09                   |
| SEY      | Mahe Island                                     | Seychelles         | NOAA ESRL         | 55.53             | -4.68            | 7.00                  | 15.0               | D                | 2000/01                     | 2021/08                   |
| SGP      | Southern Great Plains, Oklahoma                 | United States      | NOAA ESRL         | -97.50            | 36.62            | 339.00                | 75.0               | D                | 2002/04                     | 2021/12                   |
| SGP      | Southern Great Plains, Oklahoma                 | United States      | LBNL-ARM          | -97.49            | 36.61            | 374.00                | 75.0               | C                | 2011/01                     | 2020/12                   |
| SHM      | Shemya Island, Alaska                           | United States      | NOAA ESRL         | 174.08            | 52.72            | 28.00                 | 25.0               | D                | 2000/01                     | 2021/07                   |
| SIS      | Shetland Islands                                | United Kingdom     | CSIRO             | -1.25             | 60.09            | 33.00                 | 15.0               | D                | 2000/01                     | 2003/12                   |
| SMO      | Tutuila                                         | American Samoa     | NOAA ESRL         | -170.56           | -14.23           | 60.30                 | 15.0               | D                | 2000/01                     | 2021/11                   |
| SMR      | Hyytiälä                                        | Finland            | ICOS-ATC.UHELS    | 24.29             | 61.85            | 306.00                | 25.0               | C                | 2016/12                     | 2021/12                   |
| SNB      | Sonnblick                                       | Austria            | EAA               | 47.05             | 12.96            | 3111.00               | 15.0               | C                | 2012/04                     | 2018/12                   |
| SOD      | Sodankylä                                       | Finland            | FMI               | 26.64             | 67.36            | 227.00                | 25.0               | C                | 2012/01                     | 2021/12                   |
| SPO      | South Pole, Antarctica                          | United States      | NOAA ESRL         | -24.80            | -89.96           | 2821.30               | 4.5                | D                | 2000/01                     | 2021/10                   |
| STE      | Steinkimmen                                     | Germany            | ICOS-ATC.HPB      | 8.46              | 53.04            | 281.00                | 75.0               | C                | 2019/07                     | 2021/12                   |
| STM      | Ocean Station M                                 | Norway             | NOAA ESRL         | 2.00              | 66.00            | 5.00                  | 25.0               | D                | 2000/01                     | 2009/11                   |
| SUM      | Summit                                          | Greenland          | NOAA ESRL         | -38.42            | 72.60            | 3214.54               | 15.0               | D                | 2000/08                     | 2021/07                   |
| SVB      | Svartberget                                     | Sweden             | ICOS-ATC.SLU      | 19.77             | 64.26            | 419.00                | 25.0               | C                | 2017/06                     | 2021/12                   |
| SYO      | Syowa Station, Antarctica                       | Japan              | NOAA ESRL         | 39.59             | -69.00           | 16.00                 | 4.5                | D                | 2000/01                     | 2020/12                   |

**Table S1.** Continuation to Table S1.

| Sitecode | Site Name                                         | Country                   | Contributor   | Longitude<br>[°E] | Latitude<br>[°N] | Height*<br>[m a.s.l.] | Obs. Unc.<br>[ppb] | Data type<br>D/C | Date min.**<br>[year/month] | Date max.<br>[year/month] |
|----------|---------------------------------------------------|---------------------------|---------------|-------------------|------------------|-----------------------|--------------------|------------------|-----------------------------|---------------------------|
| TAC      | Tacolneston                                       | United Kingdom            | NOAA ESRL     | 1.14              | 52.52            | 236.00                | 25.0               | D                | 2014/06                     | 2016/01                   |
| TAP      | Tae-ahn Peninsula                                 | Republic of Korea         | NOAA ESRL     | 126.13            | 36.73            | 21.00                 | 75.0               | D                | 2000/01                     | 2021/10                   |
| THD      | Trinidad Head, California                         | United States             | NOAA ESRL     | -124.15           | 41.05            | 112.00                | 25.0               | D                | 2002/04                     | 2017/06                   |
| TIK      | Hydrometeorological Observatory of Tiksi          | Russia                    | NOAA ESRL     | 128.89            | 71.60            | 29.00                 | 15.0               | D                | 2011/08                     | 2018/09                   |
| TIK      | Tiksi                                             | Russian Federation        | FMI           | 128.89            | 71.60            | 29.00                 | 15.0               | C                | 2010/09                     | 2020/12                   |
| TOH      | Torfhaus                                          | Germany                   | ICOS-ATC,HPB  | 10.53             | 51.81            | 948.00                | 25.0               | C                | 2017/12                     | 2021/12                   |
| TPD      | Turkey Point, Ontario                             | Canada                    | ECCC          | -80.56            | 42.64            | 266.00                | 25.0               | C                | 2012/11                     | 2020/12                   |
| TRN      | Trainou                                           | France                    | ICOS-ATC,LSCE | 2.11              | 47.96            | 311.00                | 25.0               | C                | 2006/08                     | 2021/12                   |
| USH      | Ushuaia                                           | Argentina                 | NOAA ESRL     | -68.31            | -54.85           | 32.00                 | 4.5                | D                | 2000/01                     | 2021/06                   |
| UTA      | Wendover, Utah                                    | United States             | NOAA ESRL     | -113.72           | 39.90            | 1332.00               | 25.0               | D                | 2000/01                     | 2021/12                   |
| UTO      | Uto                                               | Finland                   | FMI           | 21.37             | 59.78            | 65.00                 | 25.0               | C                | 2012/03                     | 2018/03                   |
| UTO      | Uto                                               | Finland                   | ICOS-ATC,FMI  | 21.37             | 59.78            | 65.00                 | 25.0               | C                | 2018/03                     | 2021/12                   |
| UUM      | Ulaan Uul                                         | Mongolia                  | NOAA ESRL     | 111.10            | 44.45            | 1012.00               | 25.0               | D                | 2000/01                     | 2020/10                   |
| VGN      | Vaganovo                                          | Russian Federation        | NIES          | 62.32             | 54.50            | 277.00                | 30.0               | C                | 2008/06                     | 2018/12                   |
| VKV      | Voikovo                                           | Russian Federation        | MGO           | 30.70             | 59.95            | 76.00                 | 25.0               | C                | 2008/05                     | 2014/12                   |
| WIS      | Weizmann Institute of Science at the Arava Ins... | Israel                    | NOAA ESRL     | 35.06             | 29.96            | 482.00                | 25.0               | D                | 2000/01                     | 2021/11                   |
| WKT      | Moody, Texas                                      | United States             | NOAA ESRL     | -97.32            | 31.31            | 256.00                | 75.0               | D                | 2001/03                     | 2006/11                   |
| WLG      | Mt. Waliguan                                      | Peoples Republic of China | NOAA ESRL     | 100.90            | 36.27            | 3890.00               | 15.0               | D                | 2000/01                     | 2021/09                   |
| WPC      | Western Pacific Cruise                            | Western Pacifi            | NOAA ESRL     | 143.70            | 0.13             | 10.00                 | 15.0               | D                | 2004/12                     | 2013/06                   |
| WSA      | Sable Island, Nova Scotia                         | Canada                    | ECCC          | -60.01            | 43.93            | 8.00                  | 25.0               | C                | 2003/06                     | 2020/03                   |
| YAK      | Yakutsk                                           | Russian Federation        | NIES          | 129.36            | 62.09            | 344.00                | 30.0               | C                | 2007/09                     | 2013/12                   |
| YON      | Yonagunijima                                      | Japan                     | JMA           | 123.01            | 24.47            | 50.00                 | 30.0               | C                | 2000/01                     | 2020/12                   |
| ZEP      | Ny-Alesund, Svalbard                              | Norway and Sweden         | NOAA ESRL     | 11.89             | 78.91            | 479.00                | 15.0               | D                | 2000/01                     | 2005/01                   |
| ZEP      | Ny-Alesund, Svalbard                              | Norway and Sweden         | ICOS-ATC,NILU | 11.89             | 78.91            | 489.00                | 15.0               | C                | 2012/04                     | 2021/12                   |
| ZOT      | Zotino                                            | Russian Federation        | MPIBGC        | 89.21             | 60.48            | 415.00                | 25.0               | C                | 2009/05                     | 2016/12                   |
| ZOT      | Zotino                                            | Russian Federation        | MPIBGC        | 89.21             | 60.48            | 415.00                | 15.0               | D                | 2006/10                     | 2013/06                   |

**Table S2.** Continuation to Table 1 "List of inversion setups". The prior emissions of termites, ocean and geological priors used the atmospheric sink used are specified.

| Inversion         | Termite prior         | Ocean prior           | Geological prior      | Atmospheric sink         |
|-------------------|-----------------------|-----------------------|-----------------------|--------------------------|
| InvJSBACH_CAMSREG | VISIT                 | Tsuruta et al. (2017) |                       | ECHAM5/MESSy1            |
| InvLPX_CAMSREG    | VISIT                 | Tsuruta et al. (2017) |                       | ECHAM5/MESSy1            |
| InvLPX_EDGAR      | VISIT                 | Weber et al. (2019)   |                       | ECHAM5/MESSy1            |
| InvLPX_EDGAR_UNC  | VISIT                 | Weber et al. (2019)   |                       | ECHAM5/MESSy1            |
| InvGCP_EDGAR      | Saunois et al. (2020) | Weber et al. (2019)   | Etiopie et al. (2019) | Brühl and Crutzen (1993) |

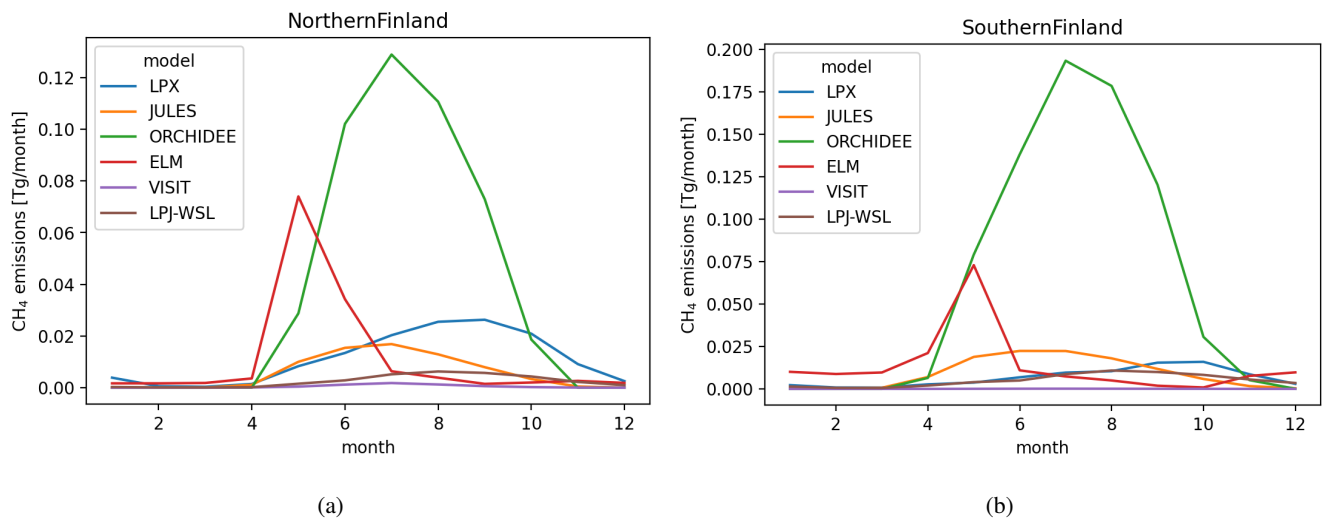

**Figure S2.** Average monthly CH<sub>4</sub> emissions of process-based models from Saunois et al. (2020) in a) northern and b) southern Finland.

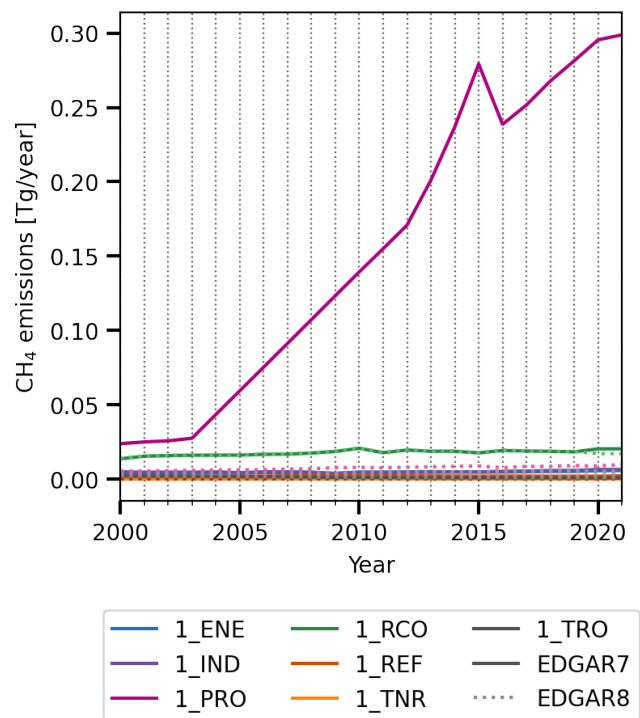

**Figure S3.** Annual energy sector CH<sub>4</sub> emissions by its components from EDGAR v7 (solid line) and v8 (dotted line).

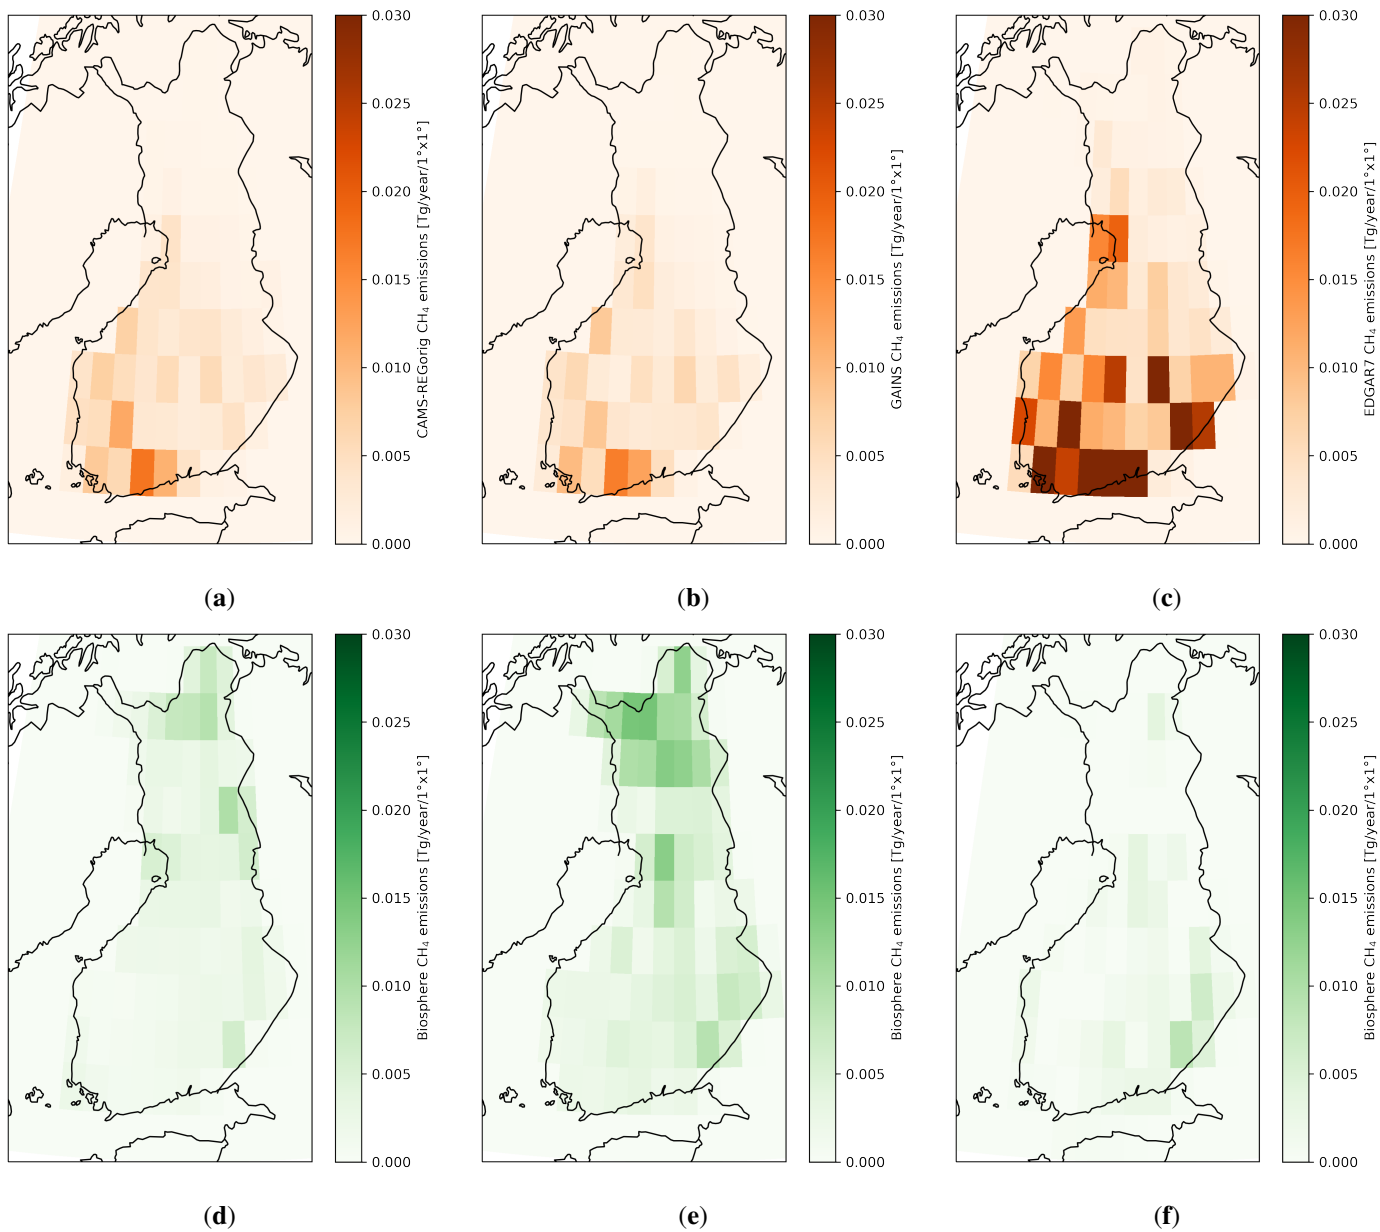

**Figure S4.** Average annual  $\text{CH}_4$  emissions from 2010–2020 of (a) CAMS-REG (orig), (b) GAINS, (c) EDGAR v7, (d) LPX-Bern DYPTOP, (e) JSBACH-HIMMELI and (f) GCP biospheric prior.



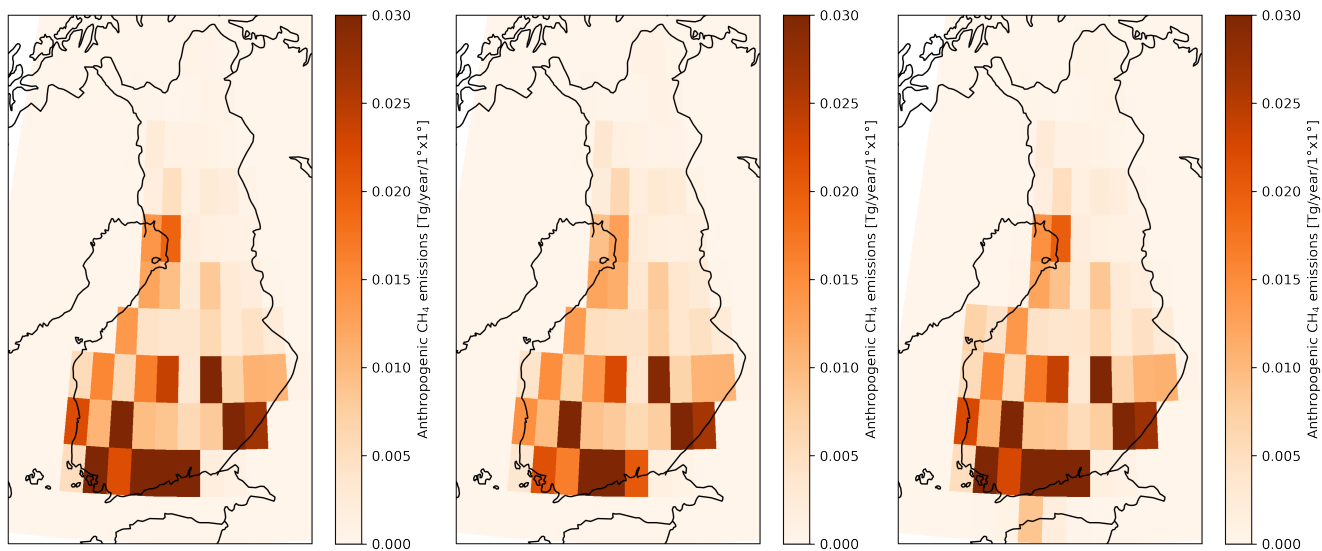

(a) InVLPX\_EDGAR

(b) InVLPX\_EDGAR\_UNC

(c) InVGCP\_EDGAR

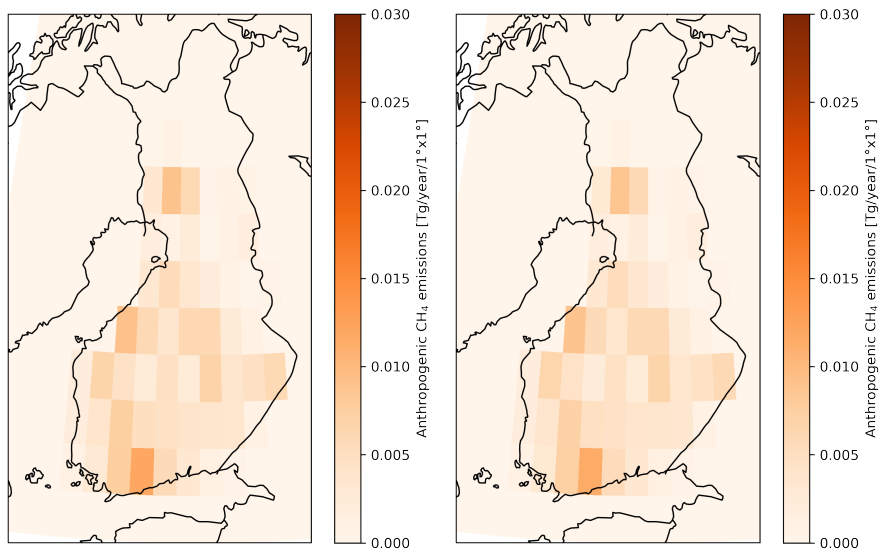

(d) InVLPX\_CAMSREG

(e) InVJSBACH\_CAMSREG

**Figure S5.** Average optimised annual anthropogenic CH<sub>4</sub> emissions from 2010–2020 from (a) InVLPX\_EDGAR, (b) InVLPX\_EDGAR\_UNC, (c) InVGCP\_EDGAR, (d) InVLPX\_CAMSREG and (e) InVJSBACH\_CAMSREG

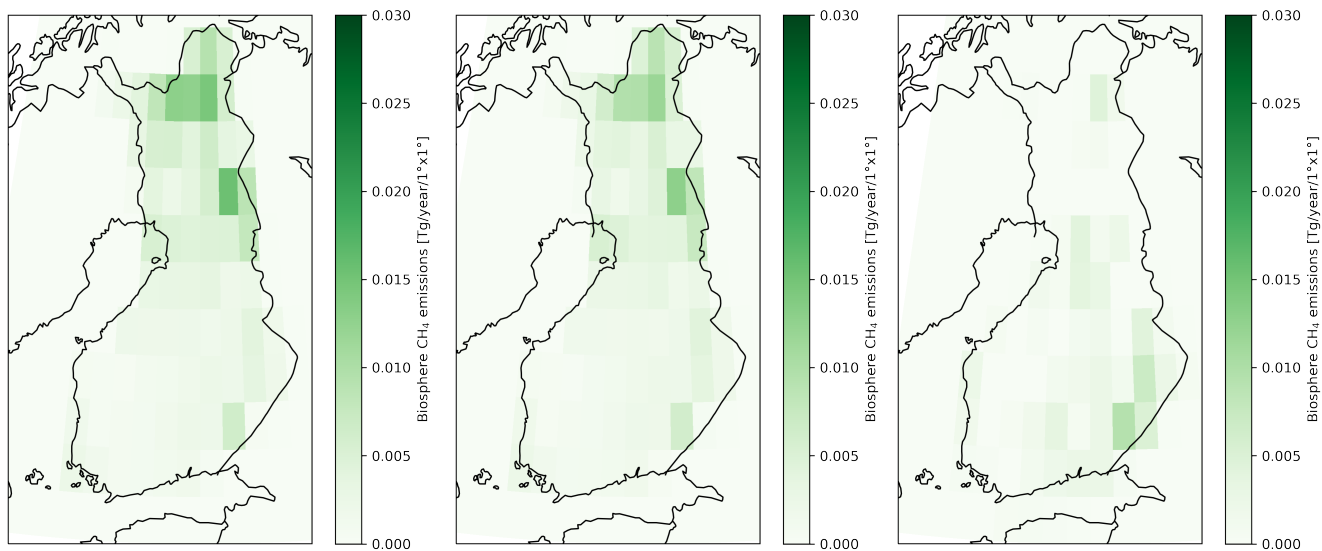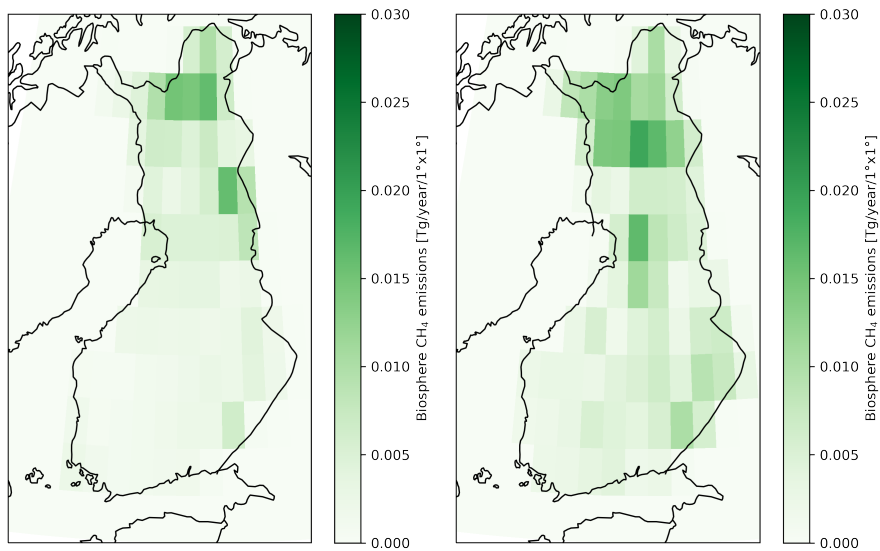

**Figure S6.** Average optimised annual natural CH<sub>4</sub> emissions from 2010–2020 from (a) InVLPX\_EDGAR, (b) InVLPX\_EDGAR\_UNC, (c) InVGCP\_EDGAR, (d) InVLPX\_CAMSREG and (e) InVJSBACH\_CAMSREG.

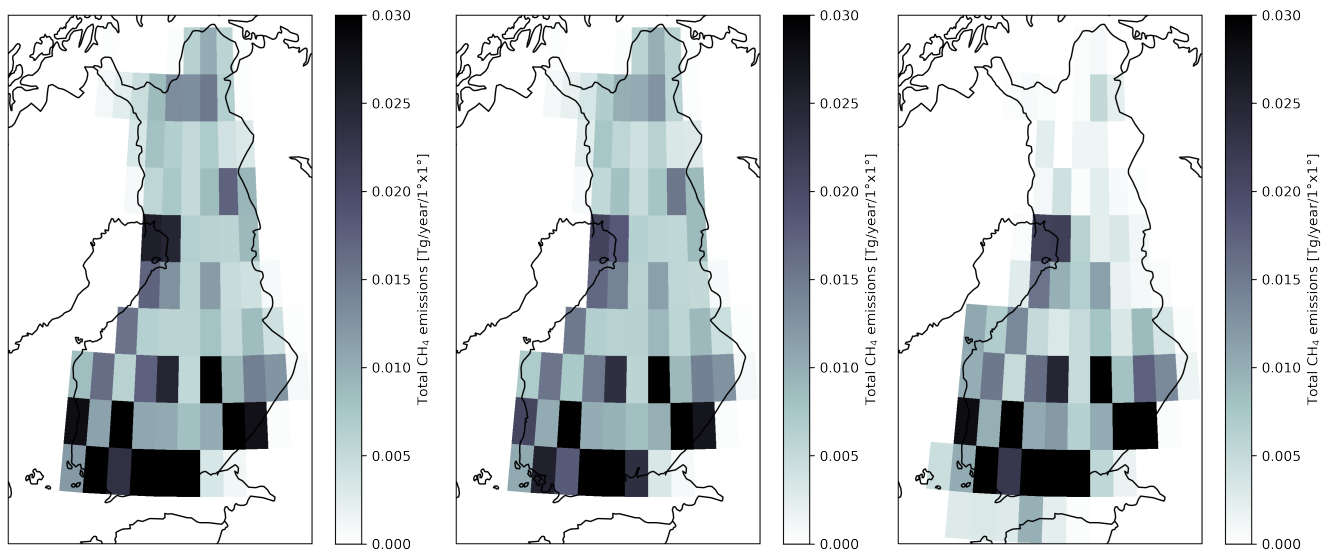

(a) InvLPX\_EDGAR

(b) InvLPX\_EDGAR\_UNC

(c) InvGCP\_EDGAR

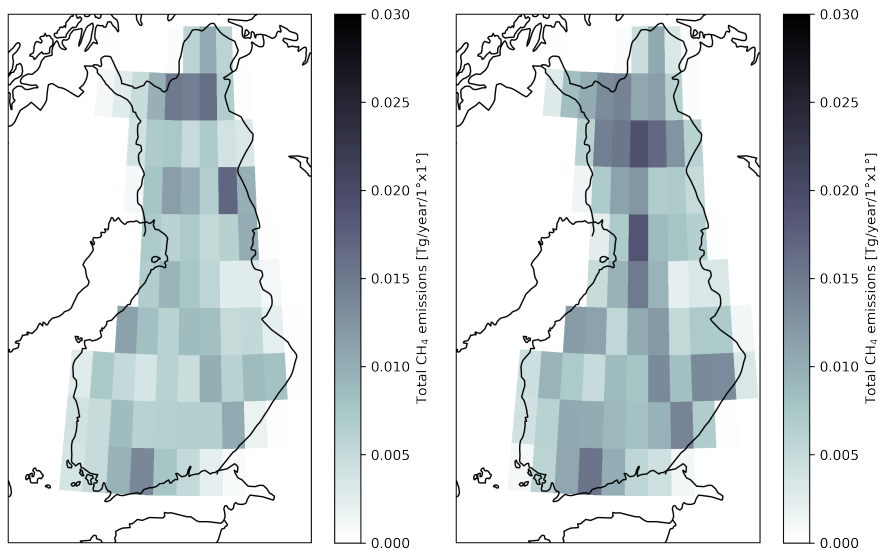

(d) InvLPX\_CAMSREG

(e) InvJSBACH\_CAMSREG

**Figure S7.** Average optimised annual total CH<sub>4</sub> emissions from 2010–2020 from (a) InvLPX\_EDGAR, (b) InvLPX\_EDGAR\_UNC, (c) InvGCP\_EDGAR, (d) InvLPX\_CAMSREG and (e) InvJSBACH\_CAMSREG

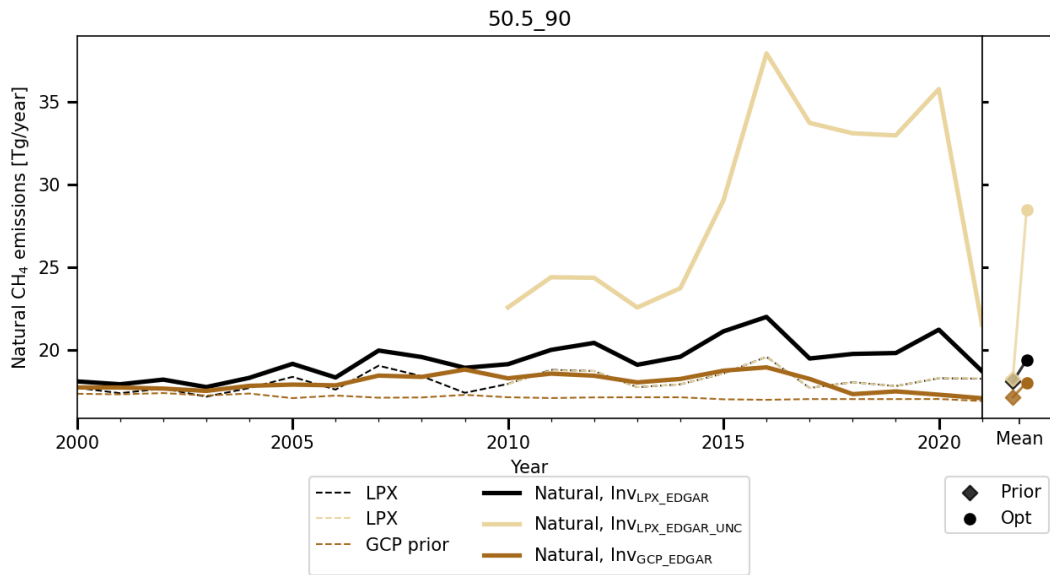

**Figure S8.** Annual natural CH<sub>4</sub> emission estimates from three CTE-CH<sub>4</sub> inverse model runs in latitudes northern than 50° N. Prior estimates are shown with dashed and optimised estimates with solid lines. The right panel shows the mean prior and optimised estimates from the whole study period.

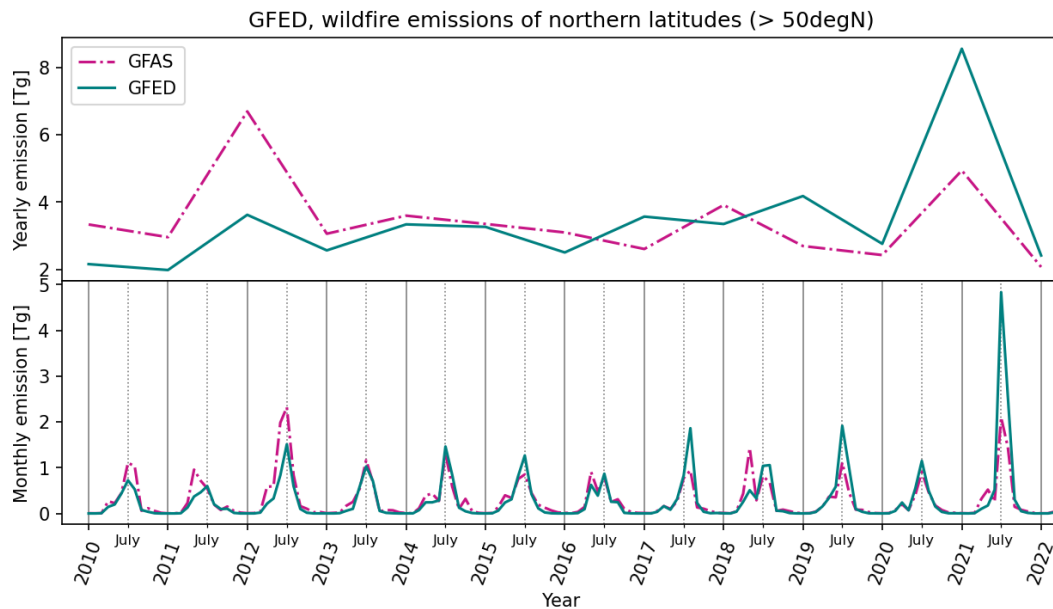

**Figure S9.** Annual (top) and monthly (bottom) CH<sub>4</sub> emissions from GFAS (dashed line) and GFED (solid line) in latitudes northern than 50° N.

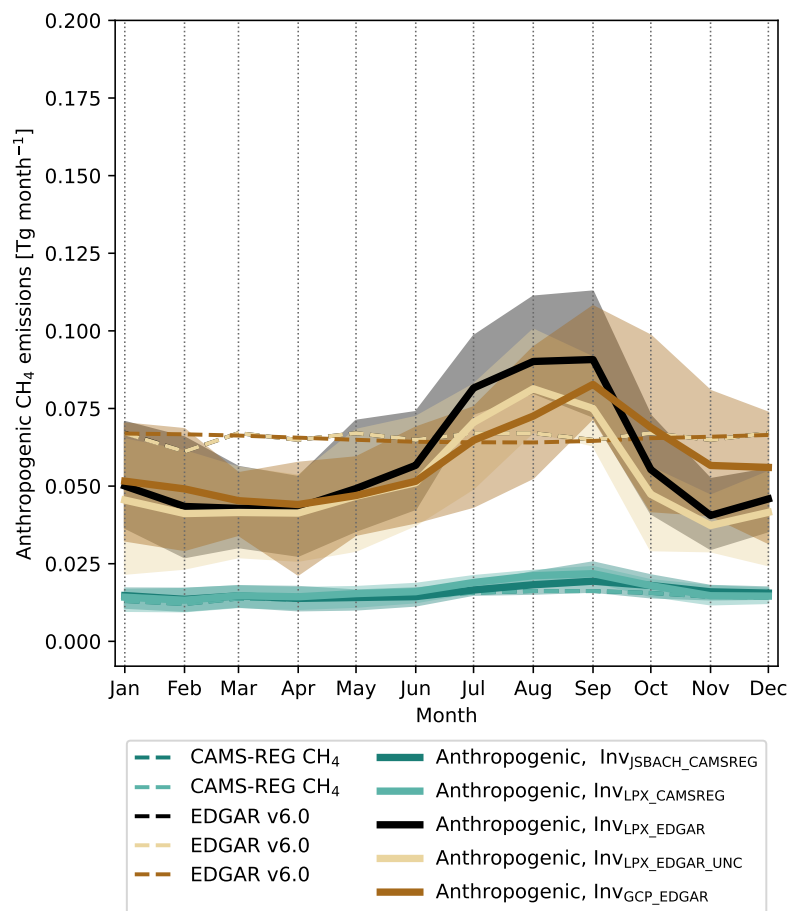

**Figure S10.** Average monthly anthropogenic CH<sub>4</sub> emission estimates from the five CTE-CH<sub>4</sub> inverse model runs in Finland in 2010–2020. Prior estimates are shown with dashed and optimised estimates with solid lines. The shaded areas show the smallest and the largest monthly posterior emission estimates.

| Inversion run                       | Site |      |      |      |      |      |      |
|-------------------------------------|------|------|------|------|------|------|------|
|                                     | UTO  | KMP  | PUI  | SMR  | PAL  | SOD  | Mean |
| Prior Inv <sub>JSBACH_CAMSREG</sub> | 2.67 | 1.33 | 2.33 | 2.67 | 2.33 | 2.33 | 2.28 |
| Prior Inv <sub>LPX_CAMSREG</sub>    | 2.33 | 2.33 | 2.67 | 3.00 | 2.67 | 2.67 | 2.61 |
| Prior Inv <sub>LPX_EDGAR</sub>      | 4.00 | 4.00 | 4.00 | 3.33 | 4.00 | 3.67 | 3.83 |
| Prior Inv <sub>GCP_EDGAR</sub>      | 1.00 | 2.33 | 1.00 | 1.00 | 1.00 | 1.33 | 1.28 |

**Figure S11.** The average rank calculated for each site for each forward run (with prior emissions) is shown. The bias, the detrended RMSE and the detrended R were calculated with each forward run in each site and values were then ranked between the model estimates (the smallest being the best with bias and RMSE and the highest being the best with R). Additionally, the right-most column is the average over all sites averages.

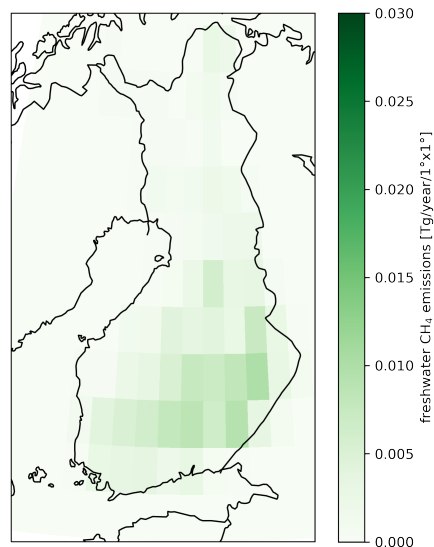

**Figure S12.** Average annual freshwater CH<sub>4</sub> emissions from 2010–2020 by Stavert et al. (2022).

## References

- Brühl, C. and Crutzen, P. J.: MPIC two-dimensional model, Tech. rep., NASA, Washington, DC, 1993.
- Etiopie, G., Ciotoli, G., Schwietzke, S., and Schoell, M.: Gridded maps of geological methane emissions and their isotopic signature, *Earth System Science Data*, 11, 1–22, <https://doi.org/10.5194/essd-11-1-2019>, 2019.
- 5 Saunois, M., Stavert, A. R., Poulter, B., Bousquet, P., Canadell, J. G., Jackson, R. B., Raymond, P. A., Dlugokencky, E. J., Houweling, S., Patra, P. K., Ciais, P., Arora, V. K., Bastviken, D., Bergamaschi, P., Blake, D. R., Brailsford, G., Bruhwiler, L., Carlson, K. M., Carrol, M., Castaldi, S., Chandra, N., Crevoisier, C., Crill, P. M., Covey, K., Curry, C. L., Etiopie, G., Frankenberg, C., Gedney, N., Hegglin, M. I., Höglund-Isaksson, L., Hugelius, G., Ishizawa, M., Ito, A., Janssens-Maenhout, G., Jensen, K. M., Joos, F., Kleinen, T., Krummel, P. B., Langenfelds, R. L., Laruelle, G. G., Liu, L., Machida, T., Maksyutov, S., McDonald, K. C., McNorton, J., Miller, P. A., Melton, J. R., Morino, I., Müller, J., Murguía-Flores, F., Naik, V., Niwa, Y., Noce, S., O’Doherty, S., Parker, R. J., Peng, C., Peng, S., Peters, G. P., Prigent, C., Prinn, R., Ramonet, M., Regnier, P., Riley, W. J., Rosentretter, J. A., Segers, A., Simpson, I. J., Shi, H., Smith, S. J., Steele, L. P., Thornton, B. F., Tian, H., Tohjima, Y., Tubiello, F. N., Tsuruta, A., Viovy, N., Voulgarakis, A., Weber, T. S., van Weele, M., van der Werf, G. R., Weiss, R. F., Worthy, D., Wunch, D., Yin, Y., Yoshida, Y., Zhang, W., Zhang, Z., Zhao, Y., Zheng, B., Zhu, Q., Zhu, Q., and Zhuang, Q.: The Global Methane Budget 2000–2017, *Earth System Science Data*, 12, 1561–1623, <https://doi.org/10.5194/essd-12-1561-2020>,  
15 2020.
- Stavert, A. R., Saunois, M., Canadell, J. G., Poulter, B., Jackson, R. B., Regnier, P., Lauerwald, R., Raymond, P. A., Allen, G. H., Patra, P. K., Bergamaschi, P., Bousquet, P., Chandra, N., Ciais, P., Gustafson, A., Ishizawa, M., Ito, A., Kleinen, T., Maksyutov, S., McNorton, J., Melton, J. R., Müller, J., Niwa, Y., Peng, S., Riley, W. J., Segers, A., Tian, H., Tsuruta, A., Yin, Y., Zhang, Z., Zheng, B., and Zhuang, Q.: Regional trends and drivers of the global methane budget, *Global Change Biology*, 28, 182–200, <https://doi.org/10.1111/gcb.15901>,  
20 2022.
- Tsuruta, A., Aalto, T., Backman, L., Hakkarainen, J., van der Laan-Luijkx, I. T., Krol, M. C., Spahni, R., Houweling, S., Laine, M., Dlugokencky, E., Gomez-Pelaez, A. J., van der Schoot, M., Langenfelds, R., Ellul, R., Arduini, J., Apadula, F., Gerbig, C., Feist, D. G., Kivi, R., Yoshida, Y., and Peters, W.: Global methane emission estimates for 2000–2012 from CarbonTracker Europe-CH4 v1.0, *Geoscientific Model Development*, 10, 1261–1289, <https://doi.org/10.5194/gmd-10-1261-2017>, 2017.
- 25 Weber, T., Wiseman, N. A., and Kock, A.: Global ocean methane emissions dominated by shallow coastal waters, *Nature Communications*, 10, 4584, <https://doi.org/10.1038/s41467-019-12541-7>, 2019.
